# Supplementary material
Source: publisher site journal article supplement (http://www.degruyter.com/publication/journal_key/HTMP/downloadAsset/HTMP_CFP%20Science%20and%20Technology%20of%20Solar%20Energy.pdf)
Supplement: Supplementary file 1 [file HTMP_CFP%20Science%20and%20Technology%20of%20Solar%20Energy.pdf]

# SCIENCE AND TECHNOLOGY OF SOLAR ENERGY IN HIGH TEMPERATURE MATERIALS AND PROCESSES

## GUEST EDITORS

---

Dr. Yoshitaro Nose, Kyoto University, Japan, [nose.yoshitaro.5e@kyoto-u.ac.jp](mailto:nose.yoshitaro.5e@kyoto-u.ac.jp)

Dr. Issei Suzuki, Tohoku University, Japan, [issei.suzuki.a5@tohoku.ac.jp](mailto:issei.suzuki.a5@tohoku.ac.jp)

## DESCRIPTION

---

We are thrilled to devote a new Topical Issue of High Temperature Materials and Processes to one of the key topics in modern materials science. We welcome your original and unpublished articles on any aspect of solar energy development, application, or/and measurement.

## HOW TO SUBMIT

---

Before submission authors should carefully read the [Instruction for Authors](#).

In order to make the preparation of manuscript easier, you are advised to use the [Manuscript Template](#).

All submissions to the Topical Issue must be made electronically via the Editorial Manager submission and tracking review system: <https://www.editorialmanager.com/htmp>.

All manuscripts will undergo the standard peer-review process (single-blind, at least two independent reviewers). When entering your submission via the online submission system please choose "Topical Issue: Solar Energy". Submission of a manuscript implies that the work described has not been published before and is not under consideration for publication anywhere else.

All accepted **review papers** in that Topical Issue will be published with a **50% discount**. Please post the SOLAR\_REVIEW keyword in the cover letter. For the authors of the **research papers**, we have prepared a **10% discount** to the APC (the keyword is SOLAR\_RESEARCH).

The deadline for submissions is **July 1<sup>st</sup>, 2022**, but individual papers will be reviewed and published online on an ongoing basis.

Your benefits due to contribution to the Topical Issue:

- ▶ indexation in Web of Science, SCOPUS, and many other services
- ▶ convenient, web-based paper submission and tracking system – Editorial Manager
- ▶ quick online publication upon completing the publishing process (continuous publication model)
- ▶ better visibility due to Open Access
- ▶ long-term preservation of the content (articles archived in Portico)
- ▶ extensive post-publication promotion for selected papers

In case of any further questions please contact the Managing Editor:  
[ewa.chmielewska@degruyter.com](mailto:ewa.chmielewska@degruyter.com).
